# Supplementary material
Source: PubMed Central journal article supplement (PMC3594487)
Supplement: NIHMS433518-supplement-01.pdf [file NIHMS433518-supplement-01.pdf]

1 **Supplementary Figures**  
2

3  
4 Supplementary Figure 1: Intermediate impact of tofacitinib treatment on CD4<sup>+</sup> and CD8<sup>+</sup> T lymphocytes.  
5 PBMC were isolated from T3<sup>b</sup>-hIL-15 Tg mice that were undergoing tofacitinib therapy at 10 and 20 days  
6 after the initiation of tofacitinib treatment and the impact of the drug on peripheral blood CD4<sup>+</sup> and CD8<sup>+</sup>  
7 T lymphocytes were assessed by flow cytometry. The modulation of these T cell subsets in three  
8 individual mice that were being treated with tofacitinib is shown.  
9  
10  
11  
12  
13  
14  
15  
16  
17  
18  
19  
20  
21  
22  
23  
24  
25  
26  
27  
28  
29  
30  
31  
32  
33  
34  
35  
36  
37  
38  
39  
40  
41  
42  
43  
44  
45  
46  
47  
48  
49  
50  
51  
52  
53  
54  
55  
56  
57  
58  
59  
60  
61  
62  
63  
64  
65

before treatment

74-1

74-5

74-6

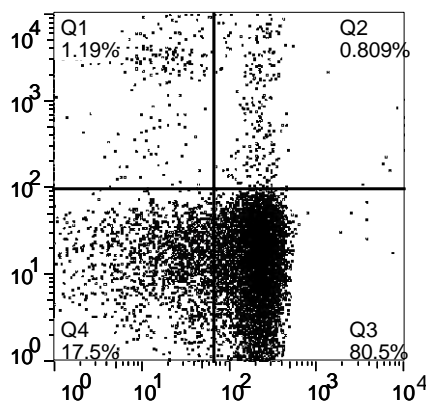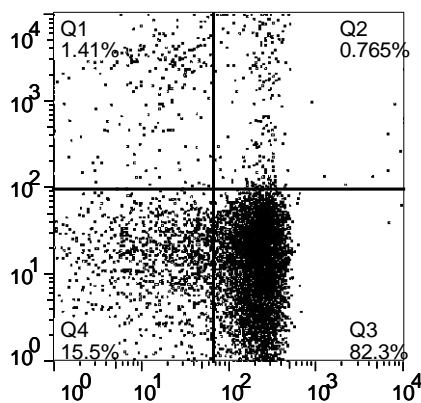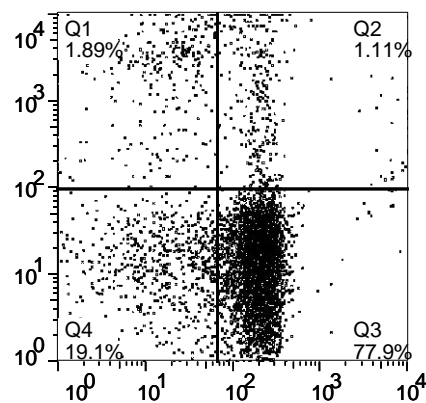

10 days with treatment

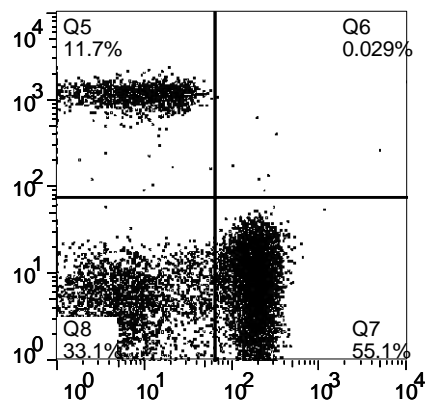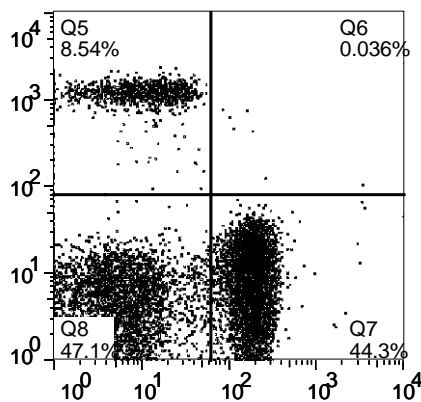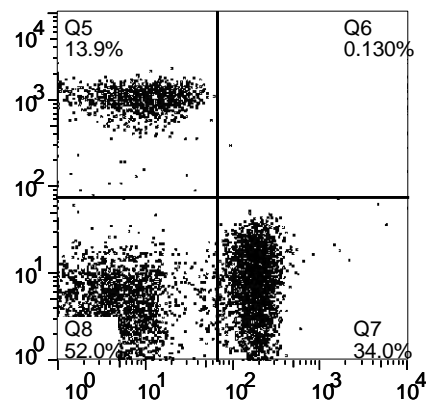

20 days with treatment

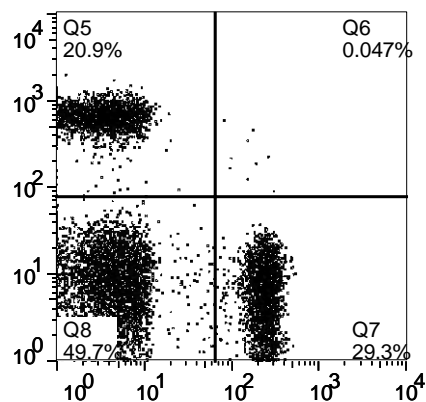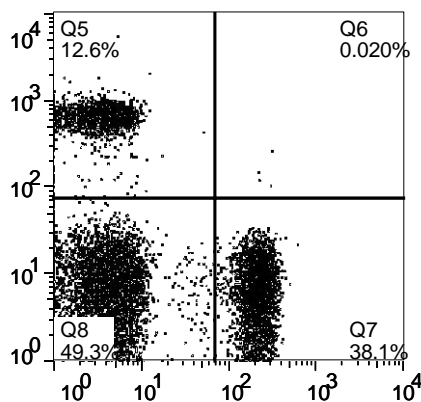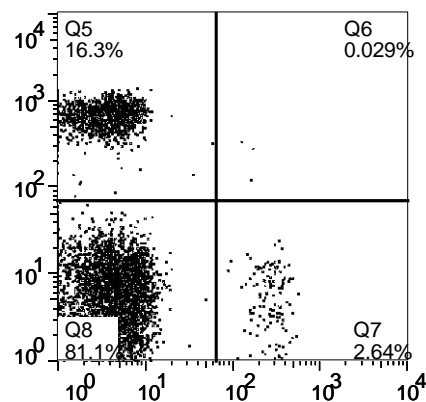

CD8
